# Supplementary material for: Quantitative proteomic analysis reveals concurrent RNA–protein interactions and identifies new RNA-binding proteins in Saccharomyces cerevisiae
Source: HighWire-hosted journal article supplement (doi:10.1101/gr.153031.112), 2013-05-01
Supplement: Supplemental_Legends.docx [file Supplemental_Legends.docx]

**Figure S1 – CDF plots showing significant enrichment of known RBPs in all datasets**

These are cumulative distribution function plots showing the cumulative fraction of all detected proteins in a given experiment that had a log 2 (-/+) RNase ratio (RNA-dependence value) less than or equal to the given value. For example, at a cumulative fraction of 0.5, half of all detected proteins had an RNA-dependence value less than or equal to the value given on the x-axis at that position. Known RBPs (defined as those that have domains known to bind RNA or have a molecular function of RNA binding in the Gene Ontology database) are plotted in red and all other proteins are plotted in blue. All plots show significant enrichment of known RBPs, indicating that known RBPs have greater RNA-dependence values when compared to proteins not known to bind RNA. (A) Plot showing the enrichment of known RBPs in the Pab1 data (Wilcoxon p-value 4.1e-8). (B) Plot showing enrichment of known RBPs in the Nab2 data (Wilcoxon p-value 1.9e-8). (C) Plot showing enrichment of known RBPs in the Puf3 data (Wilcoxon p-value 2.7e-7).

**Figure S2 – Our RNA-dependence values are not biased by protein abundance**

This is a scatterplot of the log base 2 (-/+) RNase ratios (RNA-dependence values) for all proteins we detected vs. their published protein abundance. Each spot is a different protein. There is no correlation between our RNA-dependence values and protein abundance.

**Figure S3 – Histograms of all data with null distributions and FDR cutoffs**

These are histograms (density plots) of the log base 2 (-/+) RNase ratios (RNA-dependence values) for all data (shown in blue) and the null distribution (shown in red). The vertical dashed gray line indicates the 10% FDR cutoff that was used for classifying a protein as an RNA-dependent binder. See the data analysis section of methods for an explanation of how the null distribution was estimated. (A) Histogram for Pab1, 140 proteins were above the RNA-dependent binding threshold. (B) Histogram for Nab2, 168 proteins were above the RNA-dependent binding threshold. (C) Histogram for Puf3, 51 proteins were above the RNA-dependent binding threshold.

**Figure S4 – The frequency of annotated RBPs vs. RNA dependence**

These are plots of the frequency of known RBPs in a sliding window of 101 vs. the log base 2 (-/+) RNase ratios (RNA-dependence values). There is one red plus symbol for each protein. The vertical blue dashed line indicates the 10% FDR cutoff used to classify a protein as an RNA-dependent binder (see Figure S3). The horizontal gray dashed line is the median frequency of known RBPs from all the proteins that can be detected from a yeast whole cell lysate using similar mass spectrometry techniques. The plots shown are from the purifications of Pab1 (A), Nab2 (B), and Puf3 (C).

**Figure S5 – The RNA-dependent binders we identified are enriched in published protein array data**

These are cumulative distribution function plots showing the cumulative fraction of the 220 RNA-dependent binding proteins we identified that had a rank less than or equal to the given value. For example, at a cumulative fraction of 0.5, half of all detected proteins had a protein array rank less than or equal to the value given on the x-axis at that position. The red line represents the CDF for the 220 RNA-dependent binders from the (B) Tsvetanova et al. data and (A) the Scherrer et al. data, and the black line represents all other proteins. In this previously published protein array data, smaller ranks are enriched for known RBPs. Consequently, we expect the 220 RNA-dependent binders we identified in our experiments to have significantly lower ranks in the protein array data when compared to all other proteins. This is what we see for data from Tsvetanova et al. (B) (Wilcoxon test p-value 0.005), and also with data from Scherrer et al. (A) (Wilcoxon test p-value 0.009).

**Figure S6 – Gene Ontology Terms, PFAM Domains, and KEGG Pathways enriched among candidate RBPs**

A heatmap showing the enrichment of Gene Ontology Terms, PFAM Domains, and KEGG Pathways among the proteins falling above the RNA-dependent binding threshold that are not known to bind RNA (lacking domains known to bind RNA and have a molecular function in the Gene Ontology database that is not RNA binding). Enrichment of Gene Ontology terms, PFAM domains, and KEGG pathways is depicted in green, red, and blue, respectively. Colors correspond to the negative log base 10 of the hypergeometric p-values. The columns are enrichment seen among candidate RBPs from Puf3, Pab1, Nab2, or all three combined (the union).

**Figure S7 – Overview of the UV-crosslinking assay for RNA binding**

This figure is an overview of the UV-crosslinking assay used to validate candidate RNA binding proteins. For a detailed description, see the methods section. (A) Yeast with a TAP-tagged candidate RBP are crosslinked by UV irradiation *in vivo*. The cells are lysed and the candidate RBP is purified via the TAP tag. (B) The beads are split equally into a lightly digested (micrococcal nuclease) sample and a heavily digested (micrococcal nuclease then RNase A/T1 mixture) sample. The digested RNA fragments crosslinked to the candidate RBP are labeled with 32P by polynucleotide kinase. The samples are boiled in SDS sample buffer and run on a denaturing SDS-PAGE gel. (C) The gel is visualized by autoradiography. Representative gel images are shown. Samples were run on multiple gels and visualized at multiple exposures with a range of 32P standards to quantify the molecules of RNA crosslinked to each protein. The lightly digested lanes are marked with “L” and the heavily digested lanes are marked with “H”. The lightly and heavily digested samples were always run next to each other on the same gel. Green arrows mark the bands corresponding to known RBPs, red arrows mark the bands corresponding to candidate RBPs, and blue arrows mark a common background band seen in most lanes. All images were from 60 minute exposures except for Pub1, Pab1, and Imd4, which were from 20, 20, and 180 minute exposures respectively.

**Table S1 – Pab1 RNA-dependent binders**

This is a table of all the proteins that exhibited RNA-dependent interactions with Pab1 (above our FDR threshold). Proteins that did not have two peptides in the heavy and light channels for the forward and reverse experiments but did have enough peptides to in each channel to calculate a Log2(-/+) RNase (RNA-dependence) value were reevaluated. They were given an FDR value of “PASS” if their RNA-dependence values were above the threshold defined by our FDR cutoff for RNA-dependent binders. These proteins were not included in the set of 220 proteins we classified as RNA-dependent binders or allowed to be candidate RBPs, but they are included for informational purposes here.

**Table S2 – Nab2 RNA-dependent binders**

This is a table of all the proteins that exhibited RNA-dependent interactions with Nab2 (above our FDR threshold). See the description of Table S1 for an explanation of what an FDR value of “PASS” means.

**Table S3 – Puf3 RNA-dependent binders**

This is a table of all the proteins that exhibited RNA-dependent interactions with Puf3 (above our FDR threshold). See the description of Table S1 for an explanation of what an FDR value of “PASS” means.

**Table S4 – Combined RNA-dependent binders**

This is a table of all the proteins that exhibited RNA-dependent interactions with at least one of the three proteins we purified (above our FDR threshold). See the description of Table S1 for an explanation of what an FDR value of “PASS” means.

**Table S5 – Candidate RNA binding proteins**

This is a table of all the proteins that exhibited RNA-dependent interactions with at least one of the three proteins we purified (above our FDR threshold) and do not have domains known to bind RNA or have a molecular function of RNA binding in the Gene Ontology database.

**Table S6 – Pab1 RNA-dependent binders with Mg2+**

This is a table of all the proteins that exhibited RNA-dependent interactions with Pab1 in the presence of Mg2+ (above our FDR threshold).

**Table S7 – Mass spectrometry analysis of a yeast whole cell lysate**

This is a table of all the proteins that that can be detected by similar mass spectrometry and data analysis methods from a yeast whole cell lysate.

**Table S8 –Raw mass spectrometry data from all IPs**

This spreadsheet has separate tabs for each protein that was purified, showing the raw mass spectrometry data and the forward and reverse experiments for each RBP. This data was used as input for the analysis described in the Methods section.
