# Supplementary figures and images for: Quantitative proteomic analysis reveals concurrent RNA–protein interactions and identifies new RNA-binding proteins in Saccharomyces cerevisiae
Source: HighWire-hosted journal article supplement (doi:10.1101/gr.153031.112), 2013-05-01

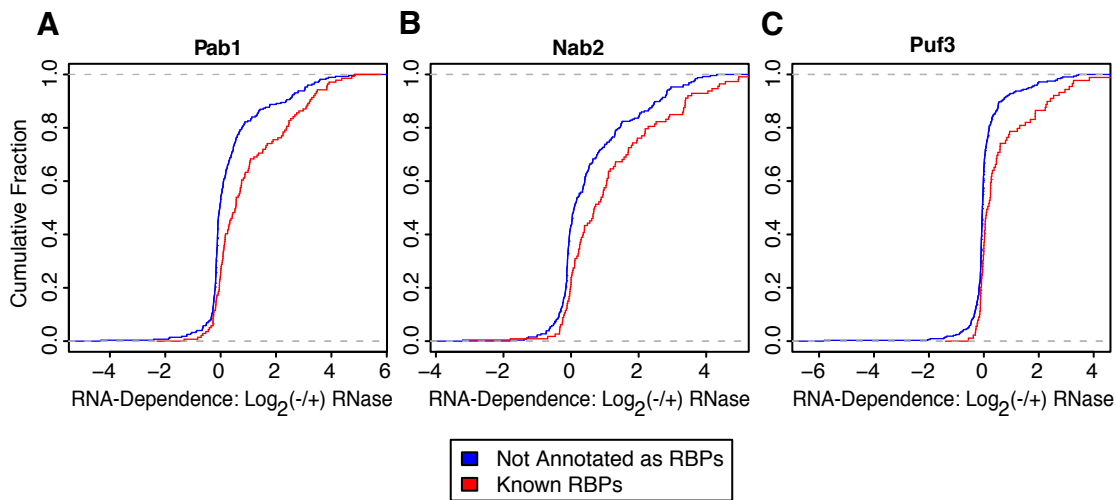

Supplement: Supplemental_Figure_S1.pdf [file Supplemental_Figure_S1.pdf]

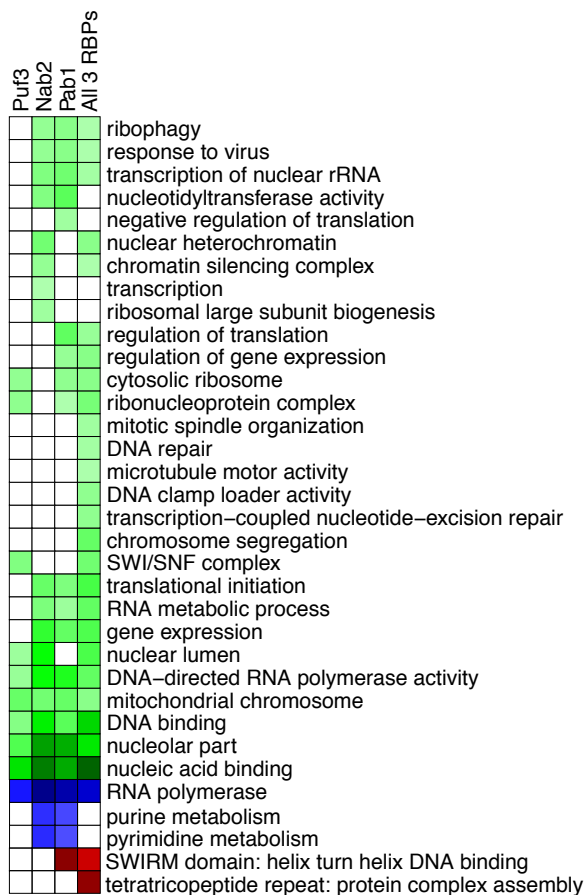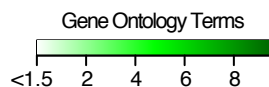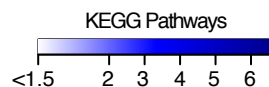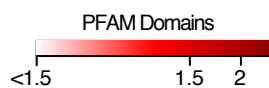

$-\log_{10}$  (p-value)  
Bonferroni corrected

Supplement: Supplemental_Figure_S6.pdf [file Supplemental_Figure_S6.pdf]
